# Supplementary material for: Chromatin accessibility underlies synthetic lethality of SWI/SNF subunits in ARID1A-mutant cancers
Source: eLife. 2017 Oct 2;6:e30506. doi: 10.7554/eLife.30506 (PMC5643100; doi:10.7554/eLife.30506)
Supplement: Figure 1—source data 1. — ARID1B protein expression in wild-type (WT) and ARID1A-/- (ARID1A-/-) HCT116 cells expressing shRNAs to scrambled control (scr) or ARID1B (KD1, KD2) was quantified by western blotting. ARID1B levels were normalized to TBP control and then KD1 and KD2 were normalized to scrambled (scr) control in WT cells. [file elife-30506-fig1-data1.xlsx]

## Sheet: Sheet1
FIGURE 1C SOURCE DATA
Protein Expression	WT						ARID1A-/-
Normalized to TBP	Rep1	Rep2	Rep3				Rep1	Rep2	Rep3
scr	0.633554	0.296	0.189				0.632829	0.483	0.162
KD1	0.257186	0.067	0.121				0.168783	0.094	0.043
KD2	0.109336	0.098	0.098				0.088551	0.058	0.019
Protein Expression
Normalized to WT scr	WT						ARID1A-/-
After TBP Normalization	Rep1	Rep2	Rep3	Mean	Std Dev		Rep1	Rep2	Rep3	Mean	Std Dev
scr	1	1	1	1	0		0.998856	1.63391	0.857865	1.16354	0.413402
KD1	0.405942	0.228097	0.639618	0.424553	0.206391		0.266407	0.317414	0.226687	0.270169	0.0454804
KD2	0.172575	0.330601	0.517674	0.340284	0.172753		0.139769	0.197377	0.0981481	0.145098	0.0498284
