# Supplementary material for: Chromatin accessibility underlies synthetic lethality of SWI/SNF subunits in ARID1A-mutant cancers
Source: eLife. 2017 Oct 2;6:e30506. doi: 10.7554/eLife.30506 (PMC5643100; doi:10.7554/eLife.30506)
Supplement: Figure 1—source data 2. — Relative proliferation over 9 days normalized to scrambled (scr) control at day 3, as determined by CellTiterGlo. Data shown from two independent biological replicates with averages and standard deviation. [file elife-30506-fig1-data2.xlsx]

## Sheet: Sheet1
FIGURE 1 - FIGURE SUPPLEMENT 1C SOURCE DATA
HCT116 WT
Relative to WT scr Day 3	scr				shARID1B KD1				shARID1B KD2
Days	Rep1	Rep2	Average	Std Dev	Rep1	Rep2	Average	Std Dev	Rep1	Rep2	Average	Std Dev
3	1	1	1	0	0.873722	1.09384	0.983779	0.155644	1.08031	0.98778	1.03404	0.0654257
6	10.0368	10.0382	10.0375	0.000994199	8.76349	10.69	9.72673	1.36223	8.45336	10.9069	9.68012	1.7349
9	49.014	37.6572	43.3356	8.03048	46.4782	39.8445	43.1613	4.69069	42.033	37.7101	39.8715	3.05672
HCT116 ARID1A-/-
Relative to ARID1A -/- scr Day 3	scr				shARID1B KD1				shARID1B KD2
Days	Rep1	Rep2	Average	Std Dev	Rep1	Rep2	Average	Std Dev	Rep1	Rep2	Average	Std Dev
3	1	1	1	0	0.587274	0.698711	0.642993	0.0787975	0.720839	0.414412	0.567625	0.216676
6	7.79522	6.2398	7.01751	1.09985	2.45671	2.86092	2.65882	0.285816	2.85386	2.07265	2.46325	0.552399
9	26.0334	24.3747	25.2041	1.1729	14.738	9.74641	12.2422	3.5296	8.12114	9.29191	8.70653	0.827855
