# Supplementary material for: Chromatin accessibility underlies synthetic lethality of SWI/SNF subunits in ARID1A-mutant cancers
Source: eLife. 2017 Oct 2;6:e30506. doi: 10.7554/eLife.30506 (PMC5643100; doi:10.7554/eLife.30506)
Supplement: Figure 4—source data 1. — FRA1 ChIP levels determined by ChIP-qPCR at TGFA, NRIP1, CALB2, and PLAU1 for wild-type (WT) and ARID1A-/- (ARID1A-/-) HCT116 cells expressing shRNAs to scrambled control (WT) or ARID1B (ARID1B KD). Values were normalized to WT for each primer set. Data is from two independent experiments. [file elife-30506-fig4-data1.xlsx]

## Sheet: Raw
FIGURE 4H SOURCE DATA
FRA1 ChIP	WT				ARID1B KD				ARID1A-/-				ARID1A-/-/ARID1B KD
	Rep1	Rep2	Average	Std Dev	Rep1	Rep2	Average	Std Dev	Rep1	Rep2	Average	Std Dev	Rep1	Rep2	Average	Std Dev
TGFA	1	1	1	0	0.63292	0.56316	0.59804	0.0493277	0.279741	0.0474476	0.163594	0.164256	0.226105	0.0926043	0.159355	0.0943995
NRIP1	1	1	1	0	0.547338	0.729941	0.63864	0.12912	0.0363041	0.0460949	0.0411995	0.00692313	0.15605	0.0587865	0.107418	0.0687755
CALB2	1	1	1	0	0.962547	0.425422	0.693984	0.379805	0.13481	0.0435822	0.0891963	0.064508	0.0447149	0.0630729	0.0538939	0.0129811
PLAU1	1	1	1	0	0.613818	1.02616	0.81999	0.29157	0.350276	0.168005	0.259141	0.128886	0.026764	0.417563	0.222164	0.276337
