# Supplementary material for: Chromatin accessibility underlies synthetic lethality of SWI/SNF subunits in ARID1A-mutant cancers
Source: eLife. 2017 Oct 2;6:e30506. doi: 10.7554/eLife.30506 (PMC5643100; doi:10.7554/eLife.30506)
Supplement: Figure 5—source data 1. — FRA1 ChIP levels determined by ChIP-qPCR at R1 and R2 within MET for wild-type (WT) and ARID1A-/- (ARID1A-/-) HCT116 cells expressing shRNAs to scrambled control (WT) or ARID1B (ARID1B KD). Values were normalized to WT for each primer set. Data is from two independent experiments. [file elife-30506-fig5-data1.xlsx]

## Sheet: Sheet1
FIGURE 5H SOURCE DATA
FRA1 ChIP at MET sites normalized to WT
	WT				ARID1B KD				ARID1A-/-				ARID1A-/- / ARID1B KD
	Rep1	Rep2	Average	Std Dev	Rep1	Rep2	Average	Std Dev	Rep1	Rep2	Average	Std Dev	Rep1	Rep2	Average	Std Dev
MET_R1	1	1	1	0	0.74173	0.698954	0.720342	0.0302469	0.511434	0.283931	0.397682	0.160869	0.254092	0.688707	0.4714	0.307319
MET_R2	1	1	1	0	0.711318	0.700649	0.705983	0.00754362	0.429481	0.227321	0.328401	0.142949	0.13257	0.231584	0.182077	0.0700134
