# Supplementary material for: Chromatin accessibility underlies synthetic lethality of SWI/SNF subunits in ARID1A-mutant cancers
Source: eLife. 2017 Oct 2;6:e30506. doi: 10.7554/eLife.30506 (PMC5643100; doi:10.7554/eLife.30506)
Supplement: Figure 5—source data 2. — eRNA levels determined by qPCR at R1 and R2 within MET for wild-type (WT) and ARID1A-/- (ARID1A-/-) HCT116 cells expressing shRNAs to scrambled control (WT) or ARID1B (ARID1B KD). Values were normalized to WT for each primer set. Data is from two independent experiments. [file elife-30506-fig5-data2.xlsx]

## Sheet: MET R1
FIGURE 5I SOURCE DATA
eRNA at MET sites normalized to WT
	WT					ARID1B KD					ARID1A-/-					ARID1A-/- / ARID1B KD
	Rep1	Rep2	Rep3	Average	Std Dev	Rep1	Rep2	Rep3	Average	Std Dev	Rep1	Rep2	Rep3	Average	Std Dev	Rep1	Rep2	Rep3	Average	Std Dev
MET_R1	1	1	1	1	0	2.88897	1.78704	1.01258	1.8962	0.942946	0.166189	0.577643	0.239697	0.327843	0.219433	0.188007	0.680214	0.381765	0.416662	0.247952
MET_R2	1	1	1	1	0	2.98844	1.14496	0.958937	1.69745	1.1219	0.268151	0.389598	0.233545	0.297098	0.0819549	0.209251	0.362579	0.252552	0.274794	0.0790465
