# Supplementary material for: Chromatin accessibility underlies synthetic lethality of SWI/SNF subunits in ARID1A-mutant cancers
Source: eLife. 2017 Oct 2;6:e30506. doi: 10.7554/eLife.30506 (PMC5643100; doi:10.7554/eLife.30506)
Supplement: Figure 5—source data 3. — Relative proliferation as determined by CellTiterGlo over 9 days in wild-type (WT) and ARID1A-/- (ARID1A-/-) HCT116 cells expressing shRNAs to scrambled control (WT) or ARID1B (ARID1B KD) with forced MET expression (MET) or empty vector control (Empty), normalized to WT Empty or WT MET at day 3. Data shown from three replicates from two different infections. [file elife-30506-fig5-data3.xlsx]

## Sheet: Sheet1
FIGURE 5J SOURCE DATA
Cell proliferation by CellTiter-Glo
Day	WT Empty						Average	Standard Deviation
3	0.981559	0.662195	1.35625	1.06213	0.907065	1.0308	1	0.225748
6	12.5026	9.61359	13.367	14.1215	10.7608	14.5039	12.4782	1.9365
9	73.013	53.4414	56.4509	80.6854	77.9855	49.0092	65.0976	13.7201
Day	WT MET						Average	Standard Deviation	Significance
3	0.978802	0.938368	1.08283	0.768158	1.12022	1.11162	1	0.135478	1
6	9.07312	16.6447	7.69051	10.6262	11.5559	16.2779	11.978	3.71735	0.777938
9	58.1233	91.3256	74.9544	73.6809	61.6066	97.3288	76.1699	15.6387	0.222038
Day	ARID1A-/- ARID1B KD Empty						Average	Standard Deviation
3	0.432923	0.554113	0.465077	0.558044	0.4269	0.473428	0.485081	0.0578456
6	3.59101	6.97221	3.91569	4.65057	3.91712	4.61505	4.61028	1.23144
9	12.5973	20.1711	16.4451	16.5567	19.0992	22.948	17.9696	3.58018
Day	ARID1A-/- ARID1B KD MET						Average	Standard Deviation	Significance
3	0.523531	0.843976	0.760886	0.821854	0.863315	0.96007	0.795605	0.148251	0.00247841
6	4.83916	5.22081	7.55736	10.7027	6.38649	8.71303	7.23659	2.22847	0.0361706
9	25.1196	24.6944	33.234	23.9768	32.5665	29.6052	28.1994	4.14717	0.00107759
