# Supplementary material for: Chromatin accessibility underlies synthetic lethality of SWI/SNF subunits in ARID1A-mutant cancers
Source: eLife. 2017 Oct 2;6:e30506. doi: 10.7554/eLife.30506 (PMC5643100; doi:10.7554/eLife.30506)
Supplement: Figure 5—source data 4. — Relative MET protein expression as determined by western blotting in wild-type (WT) and ARID1A-/- (ARID1A-/-) HCT116 cells expressing shRNAs to scrambled control (WT) or ARID1B (ARID1B KD), normalized to WT control. Data shown from three biological replicates. [file elife-30506-fig5-data4.xlsx]

## Sheet: Sheet1
FIGURE 5 - FIGURE SUPPLEMENT 4B SOURCE DATA
MET protein expression normalized to WT
	WT					ARID1B KD					ARID1A-/-					ARID1A-/- / ARID1B KD
	Rep1	Rep2	Rep3	Average	Std Dev	Rep1	Rep2	Rep3	Average	Std Dev	Rep1	Rep2	Rep3	Average	Std Dev	Rep1	Rep2	Rep3	Average	Std Dev
MET protein	1	1	1	1	0	1.09783	0.748185	0.913221	0.919747	0.174916	0.381419	0.24682	0.437795	0.355345	0.0981212	0.23529	0.173781	0.282307	0.230459	0.0544237
