# Supplementary material for: Chromatin accessibility underlies synthetic lethality of SWI/SNF subunits in ARID1A-mutant cancers
Source: eLife. 2017 Oct 2;6:e30506. doi: 10.7554/eLife.30506 (PMC5643100; doi:10.7554/eLife.30506)
Supplement: Figure 5—source data 5. — Relative MET protein expression as determined by western blotting in wild-type (WT) and ARID1A-/- (ARID1A-/-) HCT116 cells expressing shRNAs to scrambled control (WT) or ARID1B (ARID1B KD) with forced MET expression (MET) or empty vector control (Empty), normalized to WT control. Data shown from three biological replicates. [file elife-30506-fig5-data5.xlsx]

## Sheet: Sheet1
MET protein expression normalized to WT
	WT Empty					WT MET					ARID1A-/- ARID1B KD Empty					ARID1A-/- ARID1B KD MET
	Rep1	Rep2	Rep3	Average	Std Dev	Rep1	Rep2	Rep3	Average	Std Dev	Rep1	Rep2	Rep3	Average	Std Dev	Rep1	Rep2	Rep3	Average	Std Dev
MET protein	1	1	1	1	0	1.36458	1.50446	0.931298	1.26678	0.298837	0.295139	0.160714	0.0610687	0.172307	0.117465	1.09722	1.16071	0.816794	1.02491	0.183008
