# Supplementary material for: Chromatin accessibility underlies synthetic lethality of SWI/SNF subunits in ARID1A-mutant cancers
Source: eLife. 2017 Oct 2;6:e30506. doi: 10.7554/eLife.30506 (PMC5643100; doi:10.7554/eLife.30506)
Supplement: Figure 7—source data 1. — Proliferation over 9 days, as determined by CellTiterGlo. Data shown in luminescence units from two independent biological replicates with averages and standard deviation. [file elife-30506-fig7-data1.xlsx]

## Sheet: Sheet1
FIGURE 7 - FIGURE SUPPLEMENT 1B SOURCE DATA
TOV21G
Luminescence Units	scr				shARID1B KD1				shARID1B KD2
Days	Rep1	Rep2	Average	Std Dev	Rep1	Rep2	Average	Std Dev	Rep1	Rep2	Average	Std Dev
3	78583.7	53245.7	65914.7	17916.7	49909	35839.3	42874.2	9948.76	60969.7	49831	55400.3	7876.23
6	382970	253715	318343	91396.9	200741	99084.3	149913	71881.9	215980	162541	189261	37786.8
9	693427	911115	802271	153929	401776	325394	363585	54010	230381	231303	230842	652.188
