# Supplementary material for: Chromatin accessibility underlies synthetic lethality of SWI/SNF subunits in ARID1A-mutant cancers
Source: eLife journal article supplement (doi:10.7554/elife.30506), 2017-10-02
Supplement: supp [file elife-30506-supp-v1.zip]

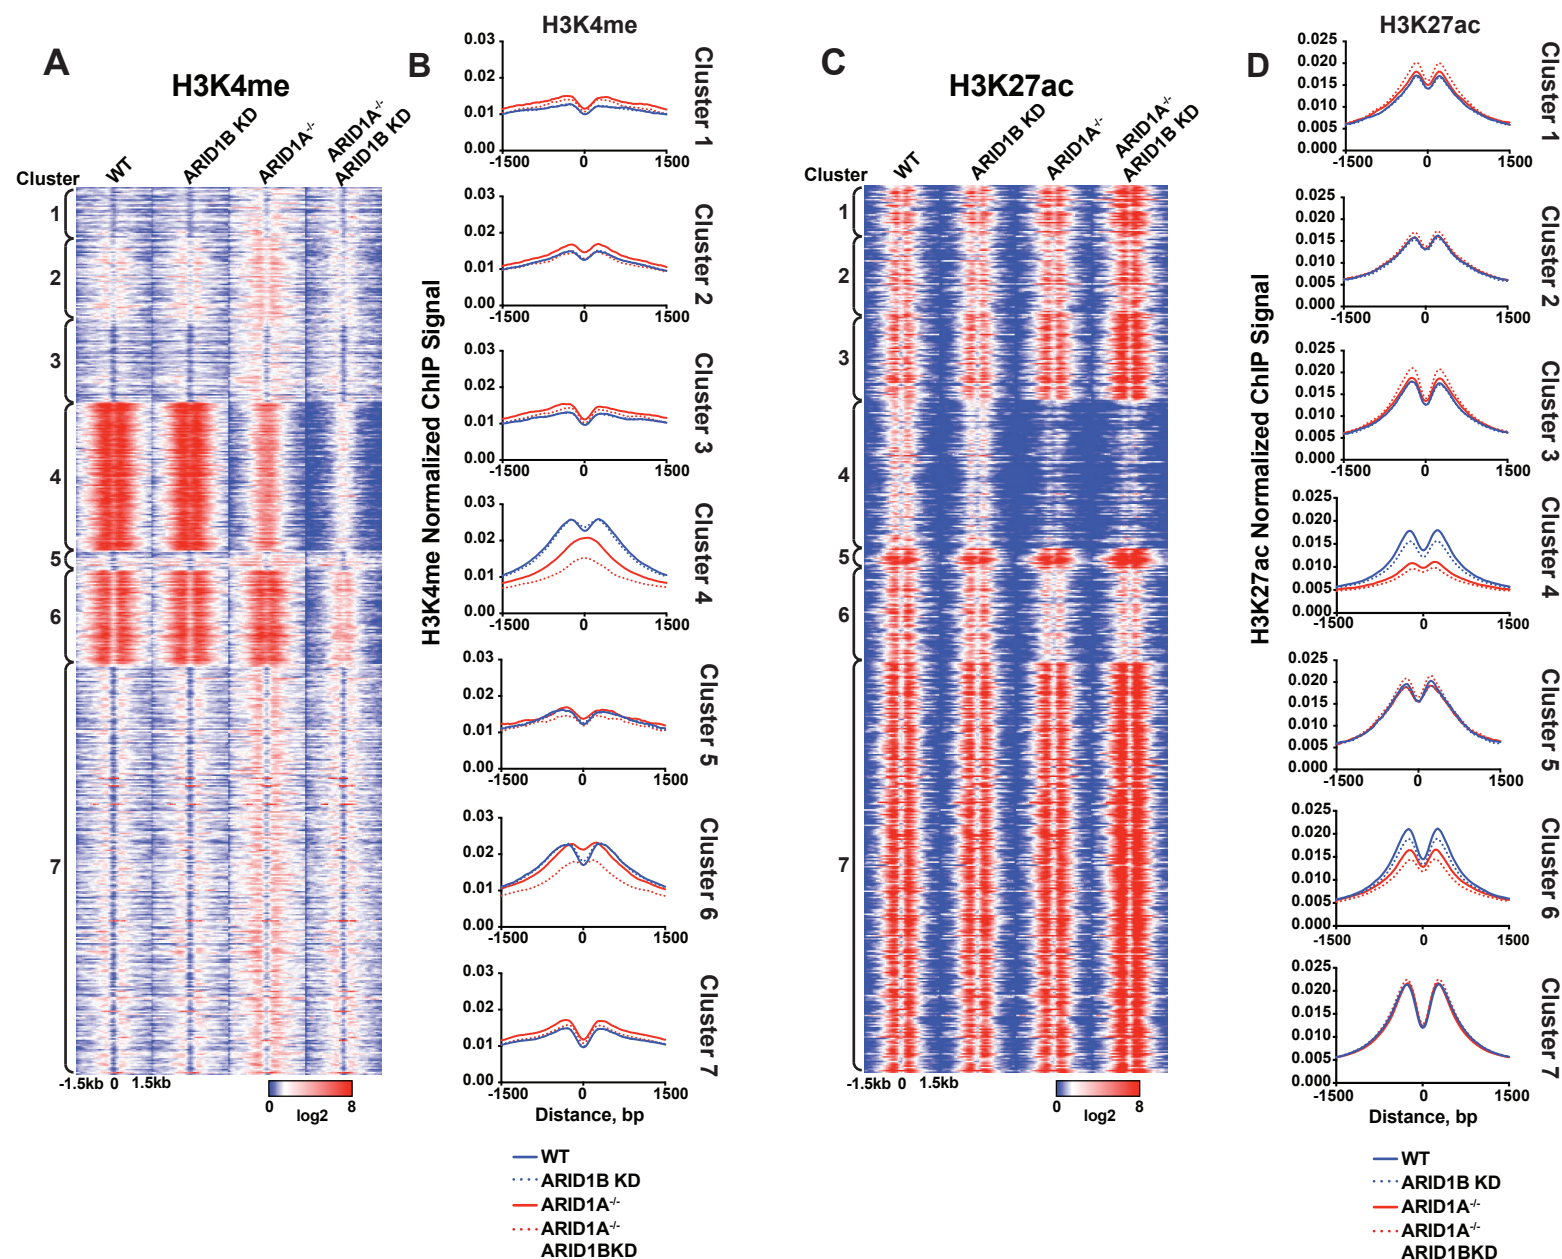

Figure 3 – Figure Supplement 3

(A) ChIP-seq tag density for H3K4me at accessible sites from Clusters 1-7 from HCT116 WT, ARID1B KD, ARID1A<sup>-/-</sup>, and ARID1A<sup>-/-</sup> ARID1B KD HCT116 cells. Reads centered on middle of accessible region  $\pm 1.5$ kb.

(B) Normalized average ChIP-seq tag density for H3K4me from two independent biological replicates at accessible sites from Clusters 1-7 from HCT116 WT, ARID1B KD, ARID1A<sup>-/-</sup>, and ARID1A<sup>-/-</sup> ARID1B KD HCT116 cells. Reads centered on middle of accessible region  $\pm 1.5$ kb.

(C) ChIP-seq tag density for H3K27ac at accessible sites from Clusters 1-7 from HCT116 WT, ARID1B KD, ARID1A<sup>-/-</sup>, and ARID1A<sup>-/-</sup> ARID1B KD HCT116 cells. Reads centered on middle of accessible region  $\pm 1.5$ kb.

(D) Normalized average ChIP-seq tag density for H3K27ac from two independent biological replicates at accessible sites from Clusters 1-7 from HCT116 WT, ARID1B KD, ARID1A<sup>-/-</sup>, and ARID1A<sup>-/-</sup> ARID1B KD HCT116 cells. Reads centered on middle of accessible region  $\pm 1.5$ kb.
