# Supplementary material for: Chromatin accessibility underlies synthetic lethality of SWI/SNF subunits in ARID1A-mutant cancers
Source: eLife journal article supplement (doi:10.7554/elife.30506), 2017-10-02
Supplement: supp [file elife-30506-supp-v1.zip]

A

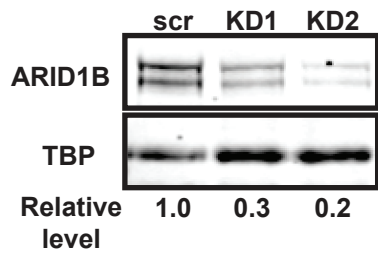

B

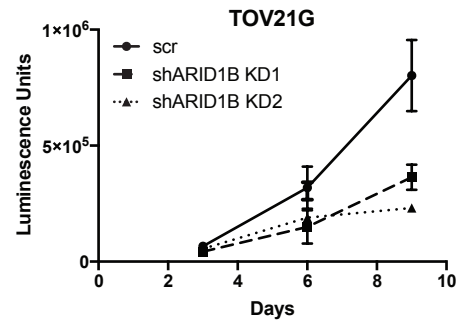

Figure 7 - Figure Supplement 1

(A) Western blot of ARID1B expression in TOV21G cells with shRNAs to scrambled control (scr) or ARID1B (KD1, KD2). TBP used as loading control. Representative of two independent biological replicates.

(B) CellTiterGlo measurements at 3, 6, or 9 days of growth of TOV21G cells expressing shRNAs to scrambled control (scr) or ARID1B (shARID1B KD1, shARID1B KD2). Averages shown from two independent biological replicates with standard deviation.
