# Supplementary material for: Chromatin accessibility underlies synthetic lethality of SWI/SNF subunits in ARID1A-mutant cancers
Source: eLife journal article supplement (doi:10.7554/elife.30506), 2017-10-02
Supplement: supp [file elife-30506-supp-v1.zip]

Figure 4 - Figure Supplement 1

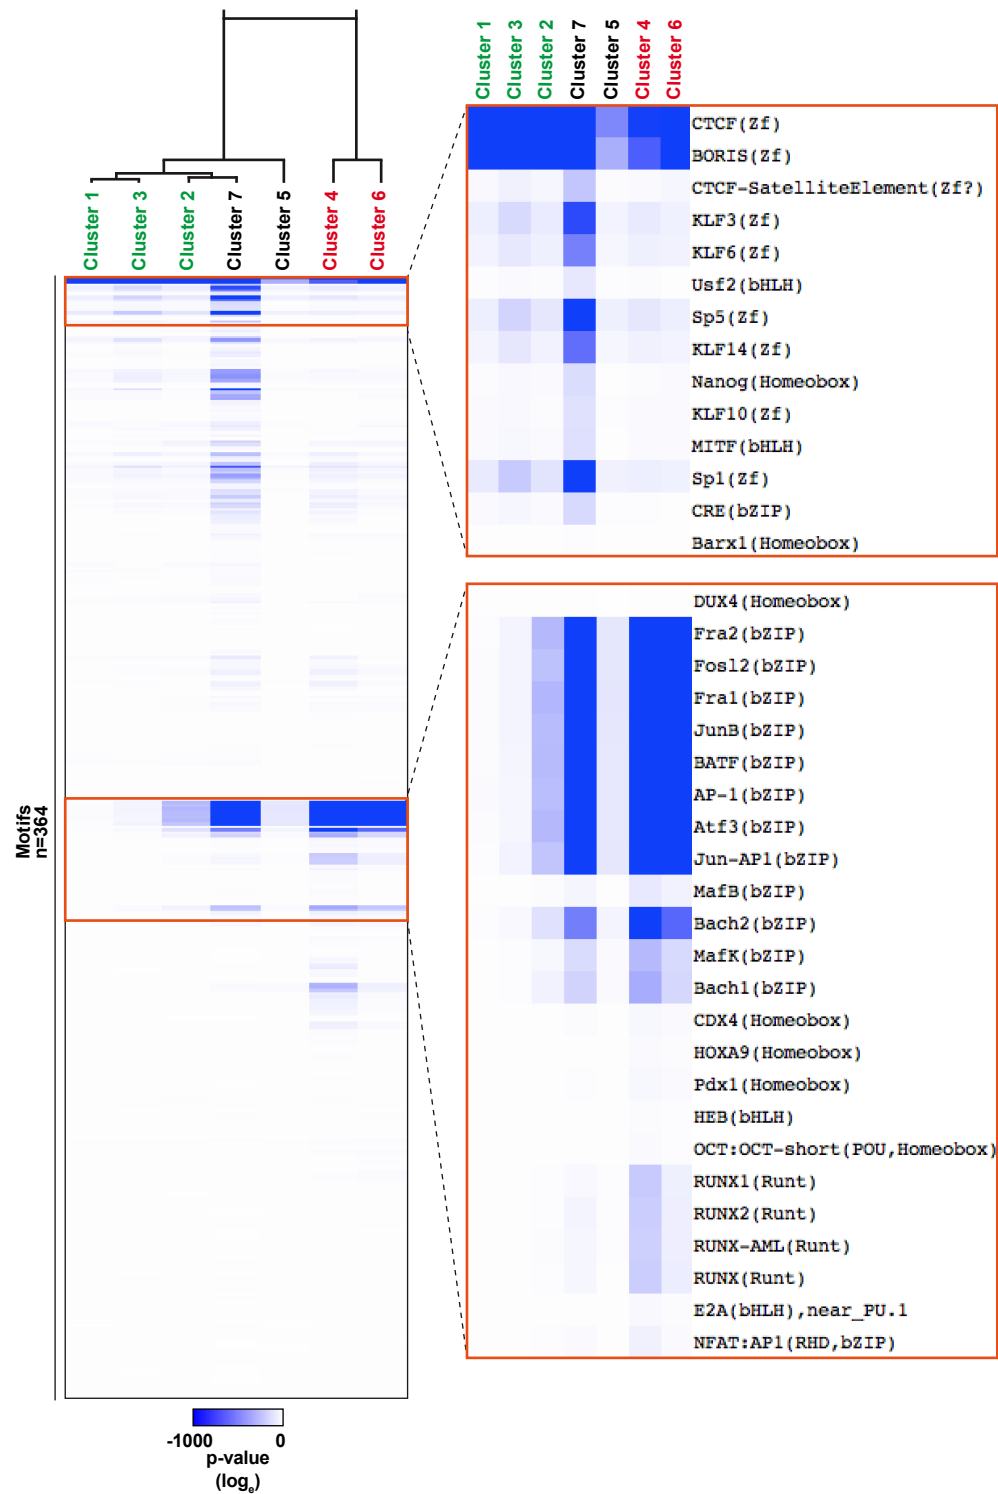

Figure 4 - Figure Supplement 1  
Heatmap of motif enrichment p values ( $\log_e$ ) in Clusters 1-7.
