# Supplementary material for: Chromatin accessibility underlies synthetic lethality of SWI/SNF subunits in ARID1A-mutant cancers
Source: eLife journal article supplement (doi:10.7554/elife.30506), 2017-10-02
Supplement: supp [file elife-30506-supp-v1.zip]

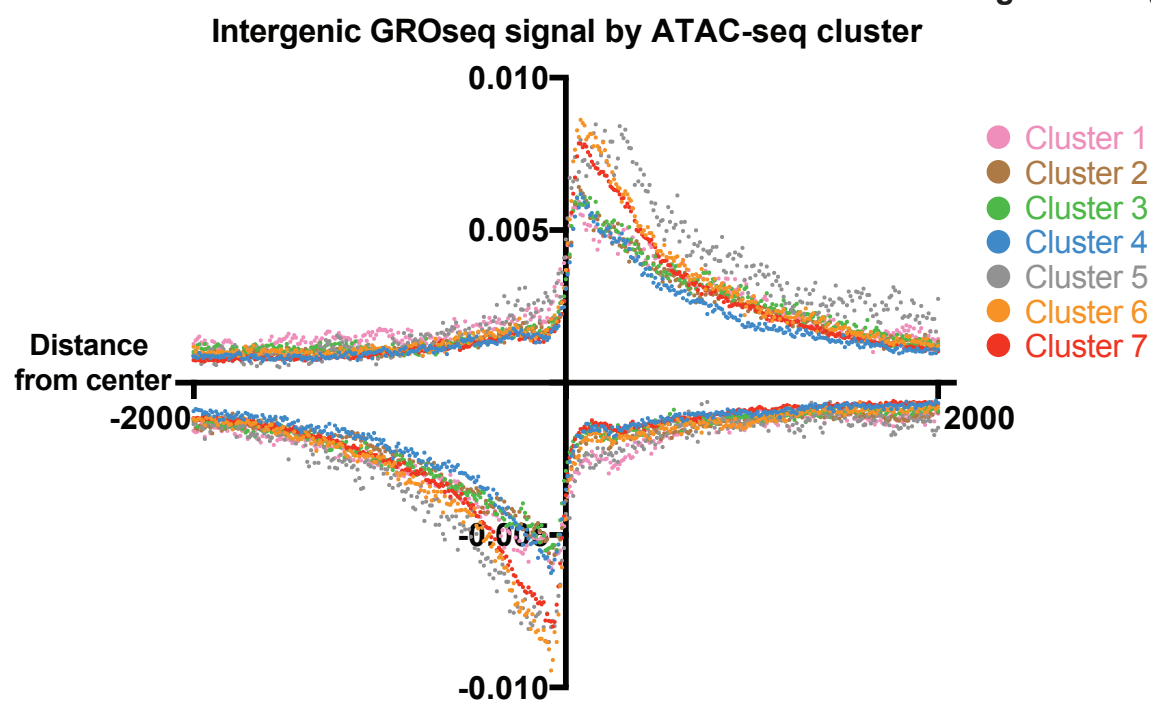

Figure 3 – Figure Supplement 1

GRO-seq signal from intergenic sites in Clusters 1-7 centered on the middle of the accessible region  $\pm 2\text{kb}$ .
