# Supplementary material for: Chromatin accessibility underlies synthetic lethality of SWI/SNF subunits in ARID1A-mutant cancers
Source: eLife journal article supplement (doi:10.7554/elife.30506), 2017-10-02
Supplement: supp [file elife-30506-supp-v1.zip]

Figure 7 - Figure Supplement 2

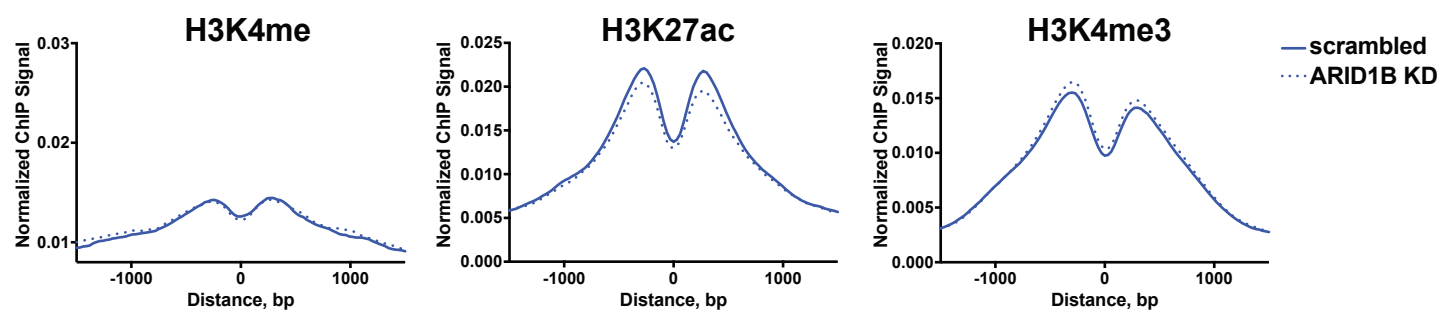

Figure 7 - Figure Supplement 2  
Normalized average ChIP-seq tag density for H3K4me, H3K27ac, and H3K4me from two independent biological replicates at increased accessible sites from scrambled or ARID1B KD TOV21G cells. Reads centered on middle of accessible region  $\pm 1.5\text{kb}$ .
