# Supplementary material for: Chromatin accessibility underlies synthetic lethality of SWI/SNF subunits in ARID1A-mutant cancers
Source: eLife journal article supplement (doi:10.7554/elife.30506), 2017-10-02
Supplement: supp [file elife-30506-supp-v1.zip]

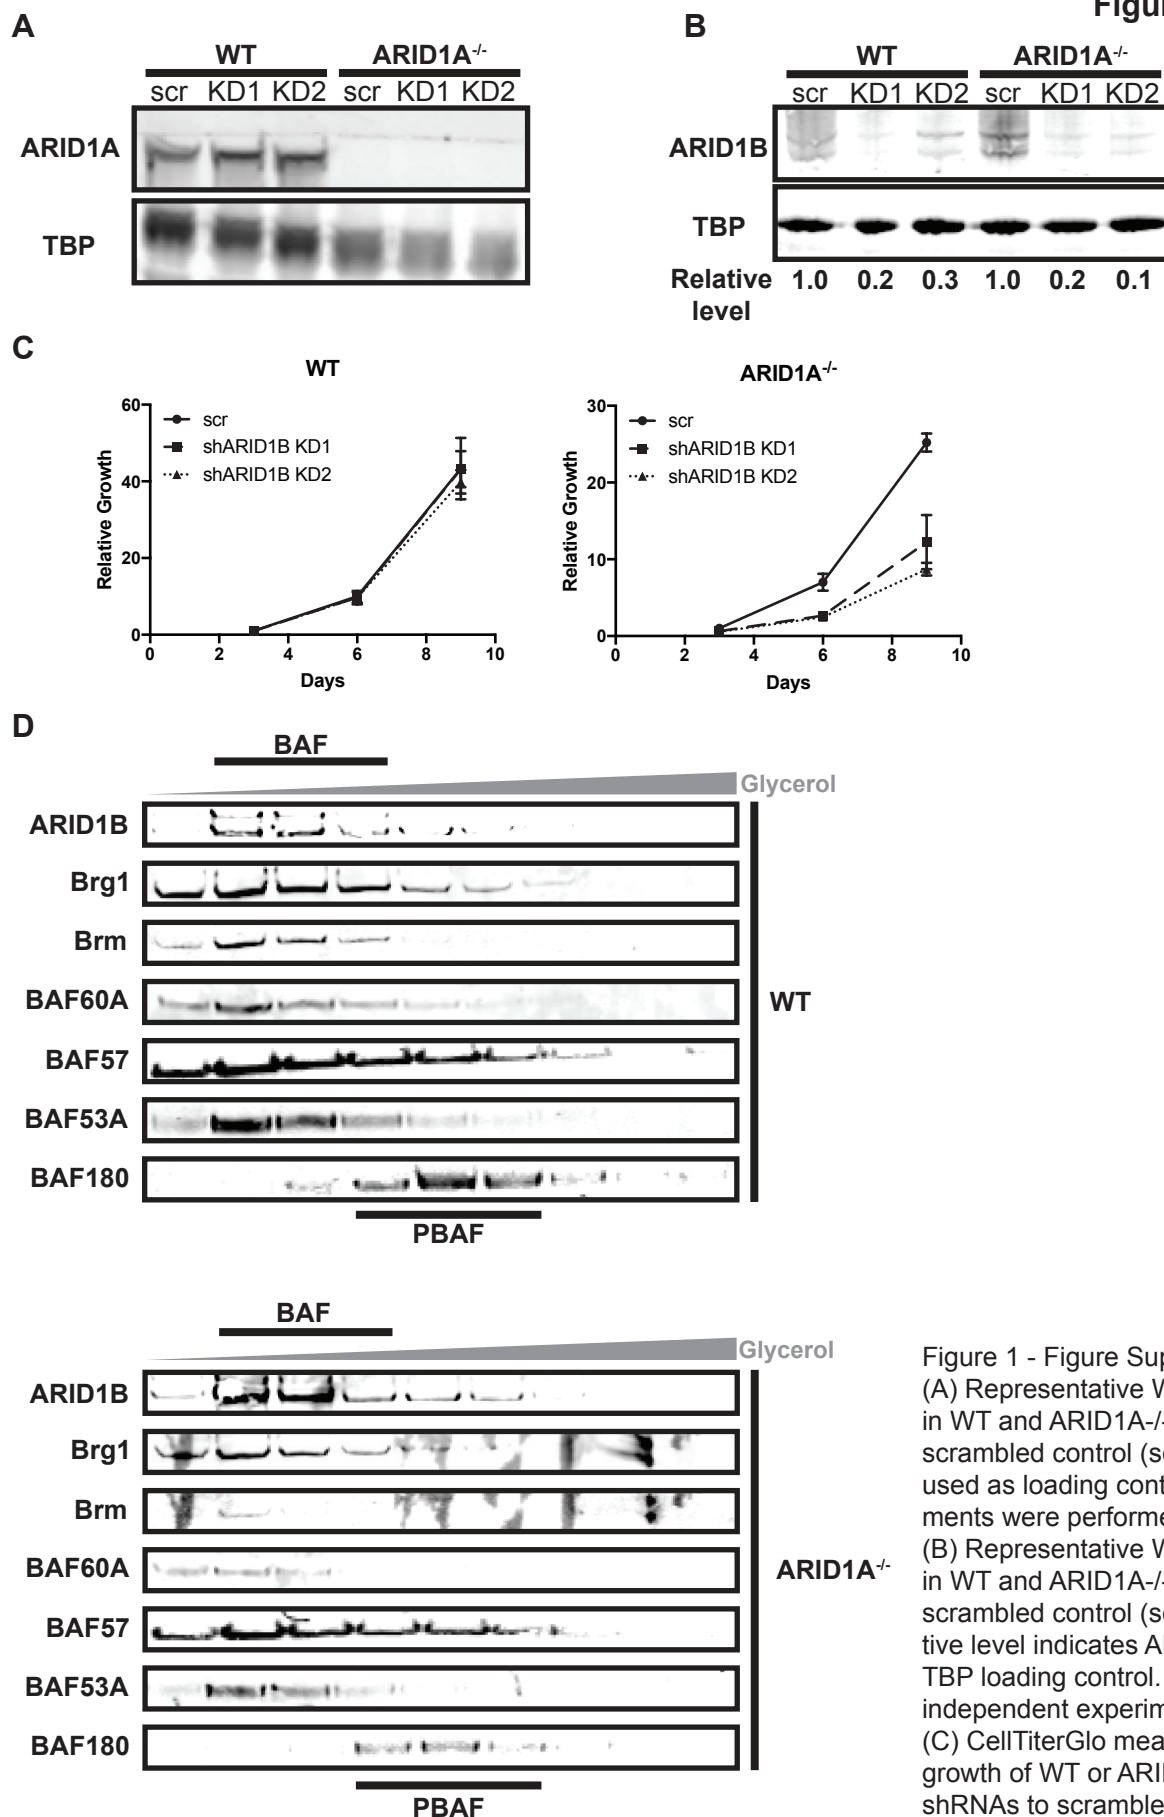

Figure 1 - Figure Supplement 1

(A) Representative Western blot of ARID1A expression in WT and ARID1A<sup>-/-</sup> HCT116 cells with shRNAs to scrambled control (scr) or ARID1B (KD1, KD2). TBP used as loading control. Three independent experiments were performed.

(B) Representative Western blot of ARID1B expression in WT and ARID1A<sup>-/-</sup> HCT116 cells with shRNAs to scrambled control (scr) or ARID1B (KD1, KD2). Relative level indicates ARID1B expression normalized to TBP loading control. Average relative level from three independent experiments is shown in Figure 1C.

(C) CellTiterGlo measurements after 3, 6, or 9 days of growth of WT or ARID1A<sup>-/-</sup> HCT116 cells expressing shRNAs to scrambled control (scr) or ARID1B (shARID1B KD1, shARID1B KD2) normalized to WT scr control at day 3. Averages shown from two independent biological replicates with standard deviation.

(D) Western blot of WT and ARID1A<sup>-/-</sup> HCT116 nuclear extracts separated by glycerol gradient centrifugation. Antibodies used for blotting are indicated. Representative of three biological replicates.
