# Supplementary material for: Chromatin accessibility underlies synthetic lethality of SWI/SNF subunits in ARID1A-mutant cancers
Source: eLife journal article supplement (doi:10.7554/elife.30506), 2017-10-02
Supplement: supp [file elife-30506-supp-v1.zip]

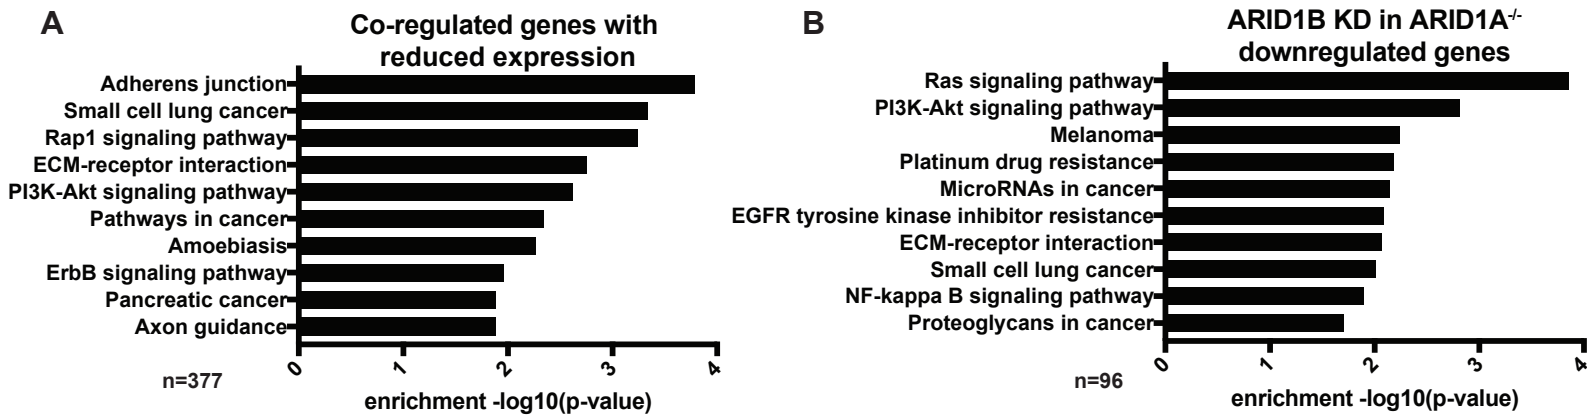

Figure 5 – Figure Supplement 3

(A) Enrichment of KEGG Pathway terms on 377 genes with reduced expression in ARID1A<sup>-/-</sup> ARID1B KD cells that exhibit decreased accessibility and H3K27ac at regulatory regions bound by SWI/SNF and FRA1 following ARID1A/ARID1B loss.

(B) Enrichment of KEGG Pathway terms for genes downregulated by ARID1B KD in ARID1A<sup>-/-</sup> HCT116 cells.
