# Supplementary material for: Chromatin accessibility underlies synthetic lethality of SWI/SNF subunits in ARID1A-mutant cancers
Source: eLife journal article supplement (doi:10.7554/elife.30506), 2017-10-02
Supplement: supp [file elife-30506-supp-v1.zip]

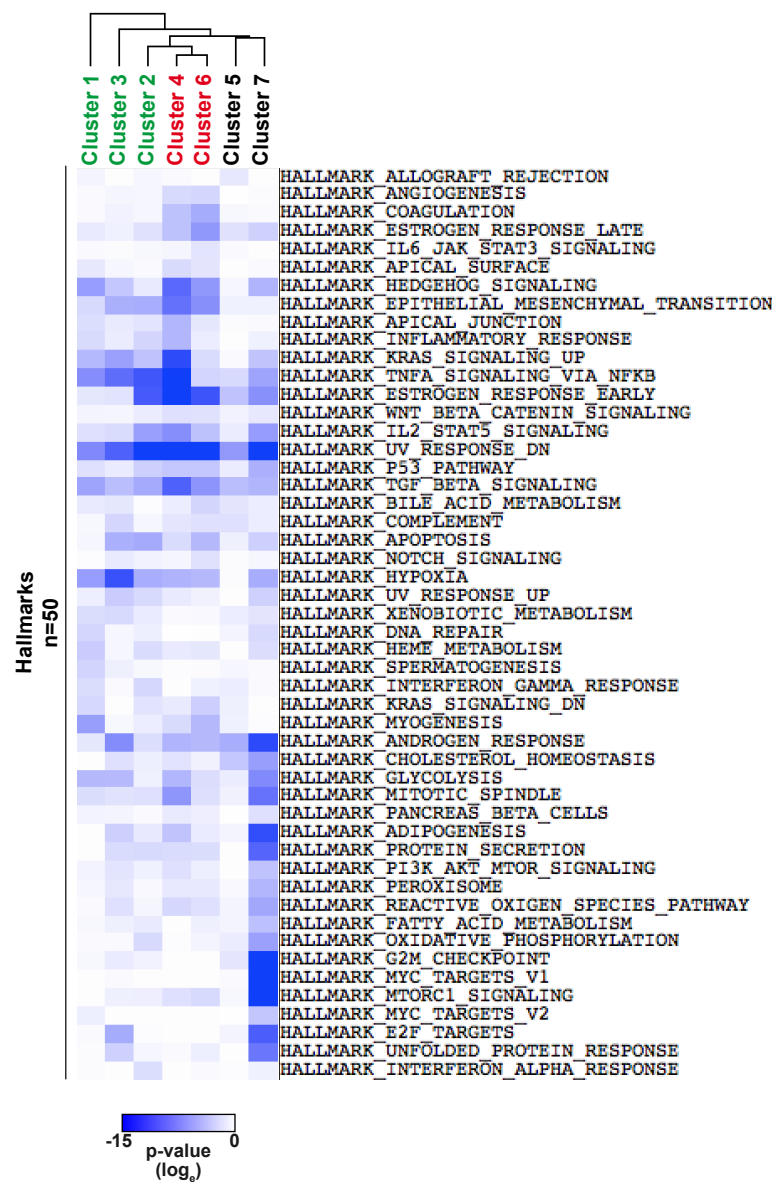

Figure 1 - Figure Supplement 3  
Hierarchical clustering of enrichment p-values (log<sub>e</sub>) using Gene Set Enrichment Analysis (GSEA) with Hallmark gene sets.
