# Supplementary material for: Chromatin accessibility underlies synthetic lethality of SWI/SNF subunits in ARID1A-mutant cancers
Source: eLife journal article supplement (doi:10.7554/elife.30506), 2017-10-02
Supplement: supp [file elife-30506-supp-v1.zip]

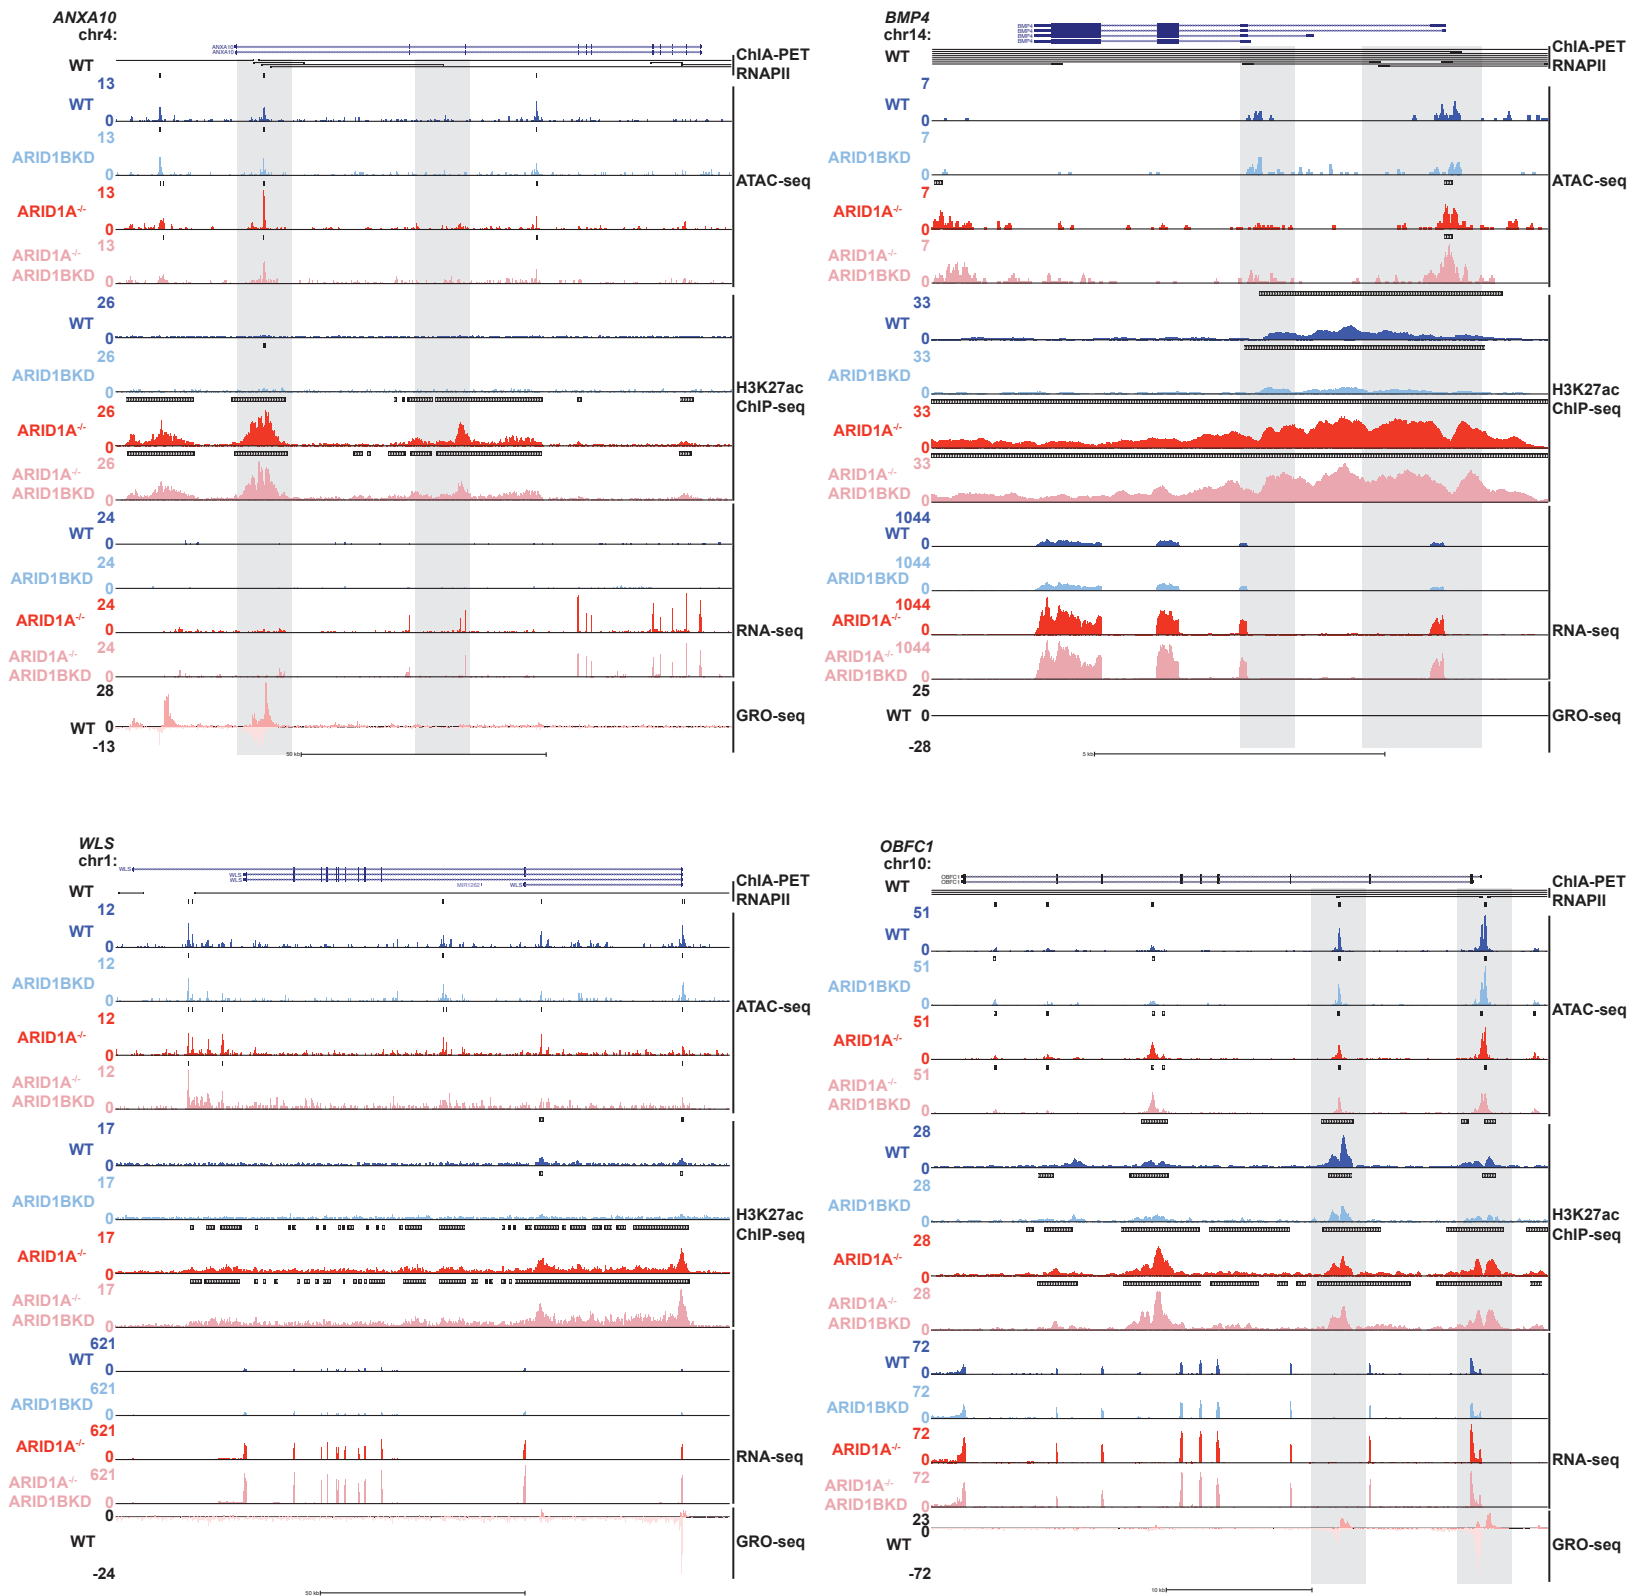

Figure 5 – Figure Supplement 2

Genome browser tracks for ATAC-seq from WT, ARID1B KD, ARID1A<sup>-/-</sup>, and ARID1A<sup>-/-</sup> ARID1B KD cells, H3K27ac ChIP-seq data for WT, ARID1B KD, ARID1A<sup>-/-</sup>, and ARID1A<sup>-/-</sup> ARID1B KD cells, RNA-seq from WT, ARID1B KD, ARID1A<sup>-/-</sup>, and ARID1A<sup>-/-</sup> ARID1B KD cells, and GRO-seq data for WT HCT116 cells at sites with gained or stable SWI/SNF occupancy. Gray boxes indicate interacting sites of increased accessibility and/or H3K27ac. These genes show no dependence on ARID1B for accessibility, H3K27ac and RNA expression in the absence of ARID1A.
