# Supplementary material for: Chromatin accessibility underlies synthetic lethality of SWI/SNF subunits in ARID1A-mutant cancers
Source: eLife journal article supplement (doi:10.7554/elife.30506), 2017-10-02
Supplement: supp [file elife-30506-supp-v1.zip]

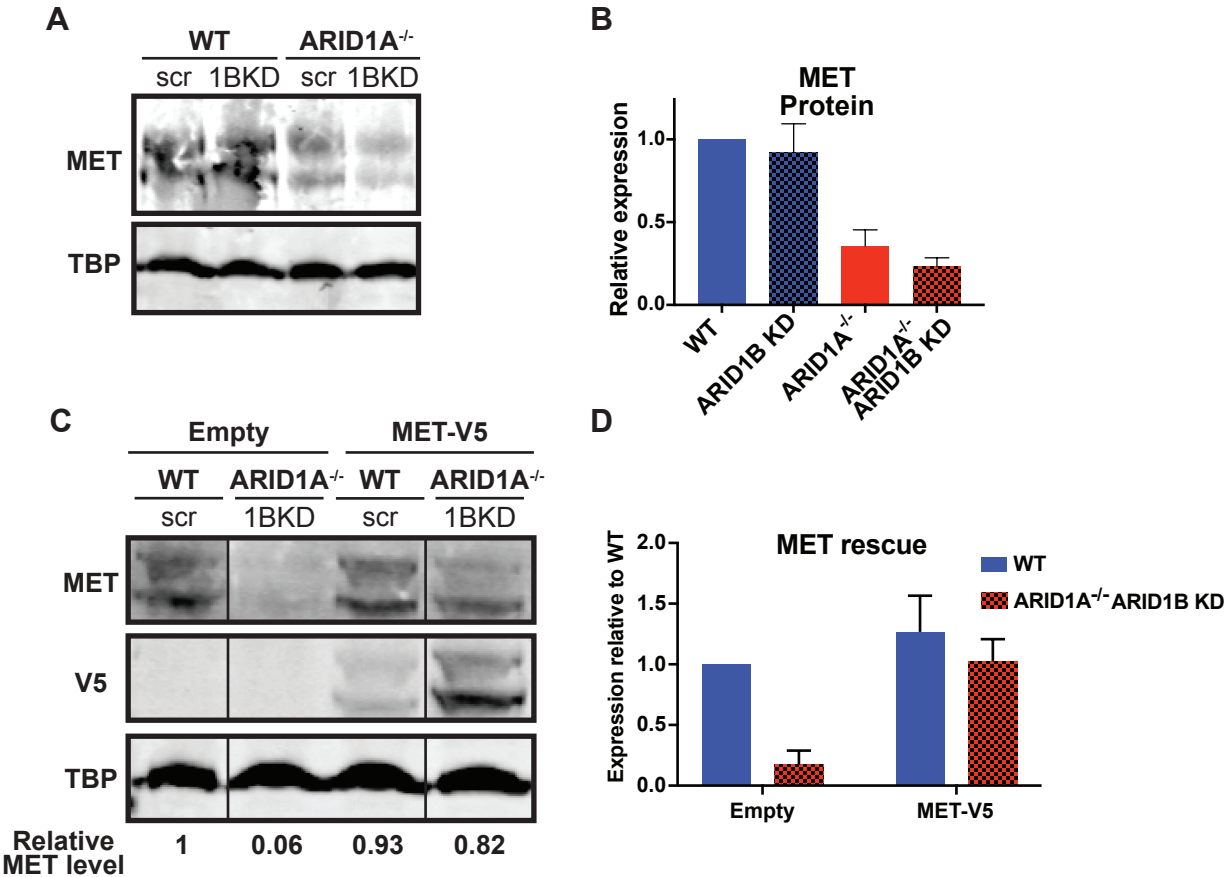

Figure 5 – Figure Supplement 4

(A) Western blot of MET expression in WT and ARID1A<sup>-/-</sup> cells expressing scrambled or ARID1B shRNA.

(B) MET protein expression determined by western blotting in WT and ARID1A<sup>-/-</sup> cells expressing scrambled or ARID1B shRNA. Average relative expression from three independent experiments

(C) Western blot of MET and V5 expression in WT and ARID1A<sup>-/-</sup> cells expressing scrambled or ARID1B shRNA and pLX\_Empty or pLX\_MET-V5. Representative of three independent experiments from three separate infections.

(D) MET protein expression determined by western blotting in WT and ARID1A<sup>-/-</sup> cells expressing scrambled or ARID1B shRNA and pLX\_Empty or pLX\_MET-V5. Average relative expression from three independent experiments from three separate infections.
