# Supplementary material for: Chromatin accessibility underlies synthetic lethality of SWI/SNF subunits in ARID1A-mutant cancers
Source: eLife journal article supplement (doi:10.7554/elife.30506), 2017-10-02
Supplement: supp [file elife-30506-supp-v1.zip]

Figure 1 - Figure Supplement 2

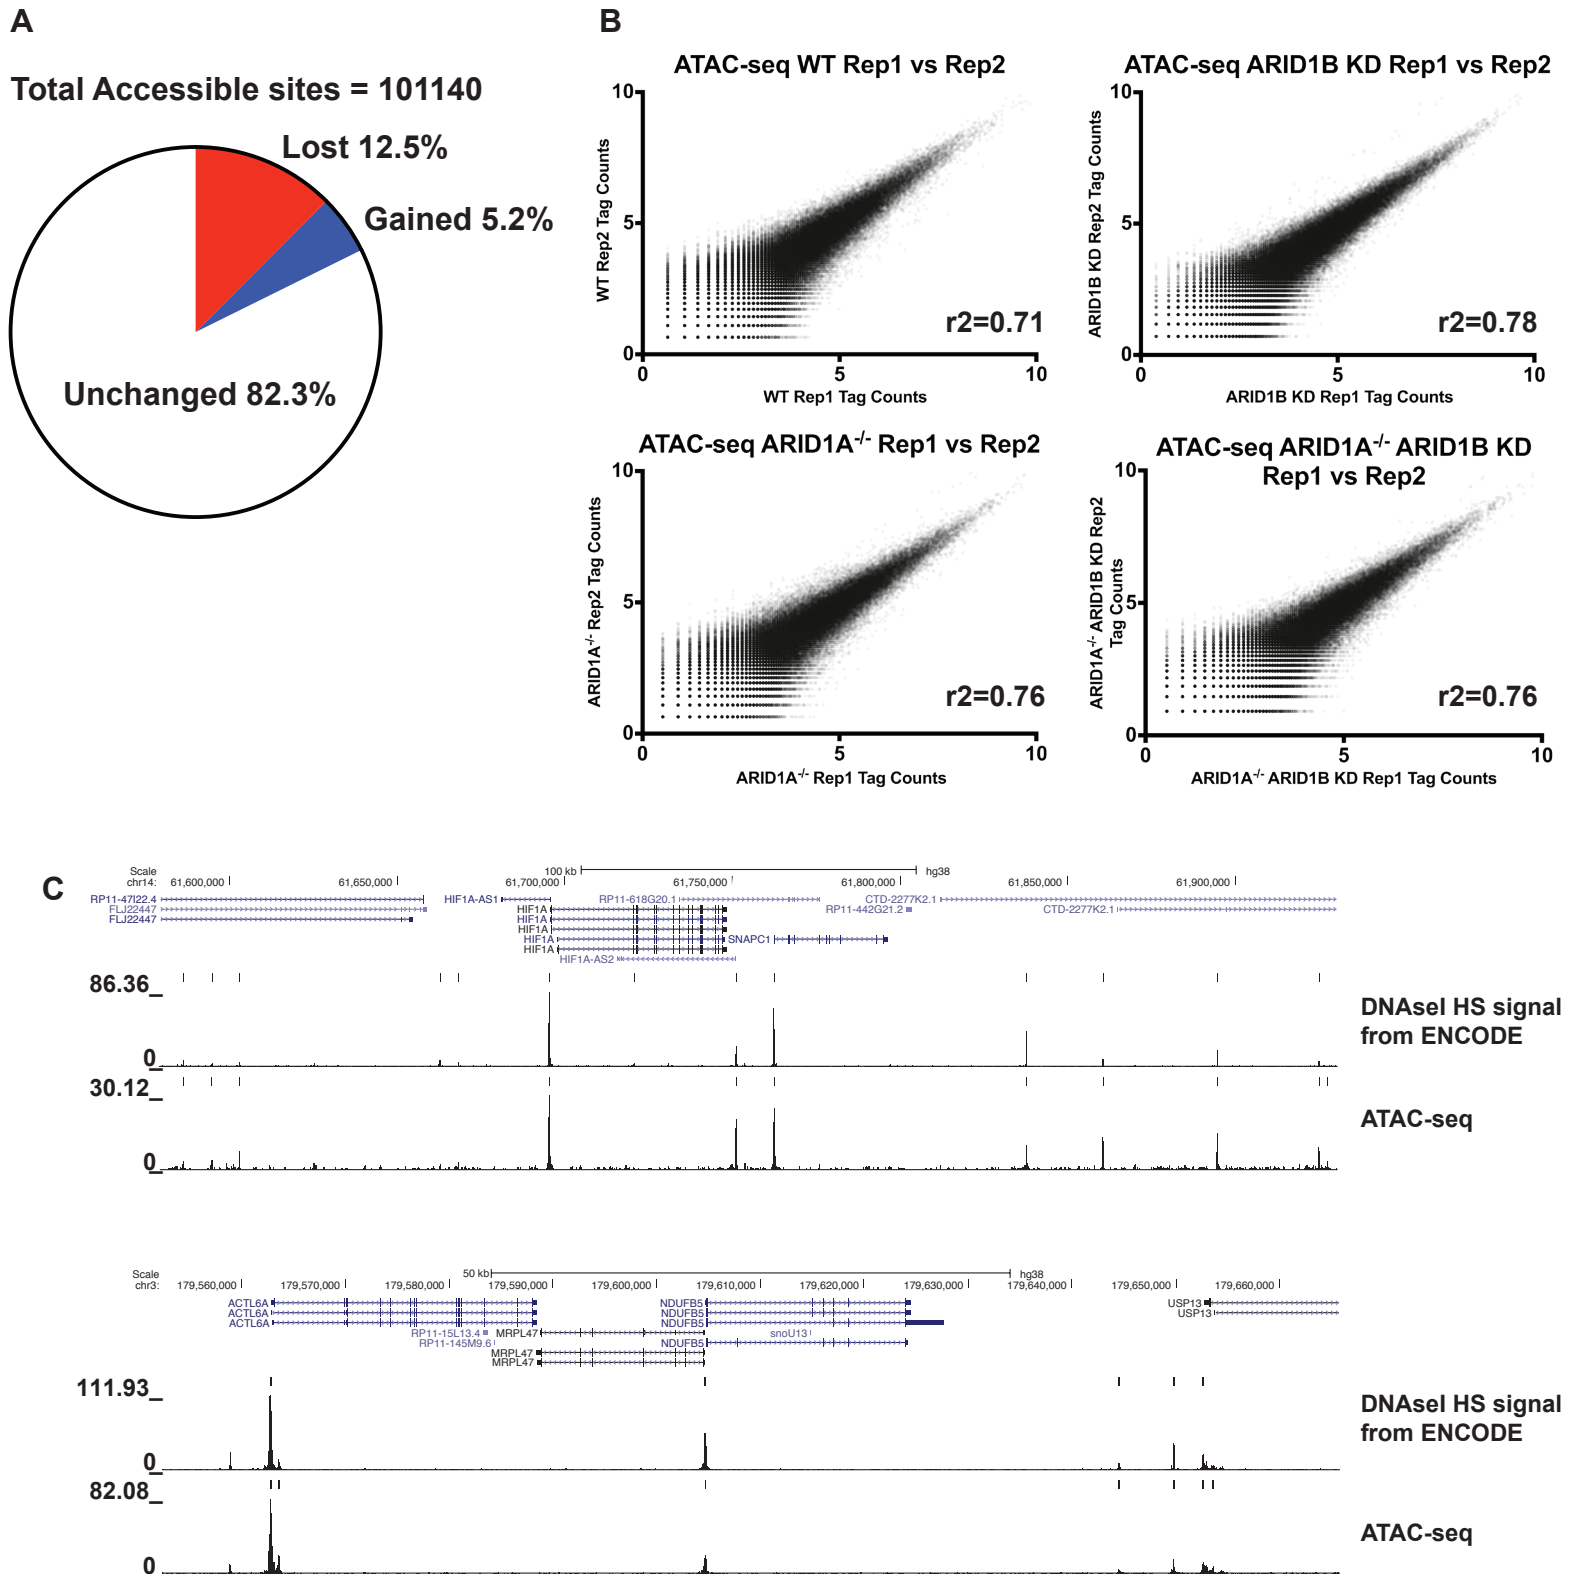

Figure 1 - Figure Supplement 2

(A) Pie chart of all accessible sites reflecting percent of sites unchanged, increased, and decreased called from WT versus ARID1A<sup>-/-</sup>/ARID1B HCT116 ATAC-seq comparisons. Data from two independent biological replicates.

(B) Correlation of ATAC-seq tag count in HCT116 WT cells expressing shRNAs to scrambled control (WT) or ARID1B (ARID1B KD), or HCT116 ARID1A<sup>-/-</sup> cells expressing shRNAs to scrambled control (ARID1A<sup>-/-</sup>) or ARID1B (ARID1A<sup>-/-</sup>ARID1B KD) from two independent biological replicates. The correlation coefficient ( $r^2$ ) between biological replicates is shown.

(C) Genome browser tracks of ATAC-seq data and DNaseI hypersensitivity (HS) data from the ENCODE project.
