# Supplementary material for: Chromatin accessibility underlies synthetic lethality of SWI/SNF subunits in ARID1A-mutant cancers
Source: eLife. 2017 Oct 2;6:e30506. doi: 10.7554/eLife.30506 (PMC5643100; doi:10.7554/eLife.30506)
Supplement: Supplementary file 1: [file elife-30506-supp1.xlsx]

## Sheet: Sequencing Quality
Cell Line	Dataset	Number of reads	Read number passing quality filter	Number of uniquely mapped reads	% uniquely mapped reads	Number of unique positions with aligned reads	Total reads associated with peaks	Fraction of unique reads associated with peaks
HCT116	ATAC-seq-WT-Rep1	44657015	44657015	36019263	80.66	18200454	1418242	0.0393745
HCT116	ATAC-seq-WT-Rep2	31673843	31673843	25260822	79.75	11147240	1436038	0.0568484
HCT116	ATAC-seq-ARID1BKD-Rep1	38707615	38707615	32664209	84.39	32815819	2590450	0.0793055
HCT116	ATAC-seq-ARID1BKD-Rep2	29723803	29723803	23776047	79.99	10301643	1266471	0.0532667
HCT116	ATAC-seq-ARID1AKO-Rep1	31994267	31994267	26359816	82.39	26871643	1786847	0.0677868
HCT116	ATAC-seq-ARID1AKO-Rep2	36214477	36214477	29202728	80.64	15161981	1410219	0.0482907
HCT116	ATAC-seq-ARID1AKO-ARID1BKD2-Rep1	41202641	41202641	33796308	82.02	28502122	1698487	0.0502566
HCT116	ATAC-seq-ARID1AKO-ARID1BKD2-Rep1	28460806	28460806	23067907	81.05	12228338	867333	0.0375991
HCT116	H3K4me-ChIP-seq-WT-Rep1	16149549	16149549	14557335	90.14	14166539	4232487	0.290746
HCT116	H3K4me-ChIP-seq-WT-Rep2	15128878	15128878	13554251	89.59	13264752	3051646	0.225143
HCT116	H3K4me-ChIP-seq-ARID1BKD-Rep1	16920810	16920810	15154280	89.56	14744448	4189750	0.276473
HCT116	H3K4me-ChIP-seq-ARID1BKD-Rep2	20169349	20169349	18036782	89.43	17584745	4661574	0.258448
HCT116	H3K4me-ChIP-seq-ARID1AKO-Rep1	18824600	18824600	16934858	89.96	16544240	5497559	0.32463
HCT116	H3K4me-ChIP-seq-ARID1AKO-Rep2	13199705	13199705	11795497	89.36	11587464	2874294	0.243677
HCT116	H3K4me-ChIP-seq-ARID1AKO-ARID1BKD-Rep1	23272433	23272433	20833722	89.52	20209505	5646053	0.271005
HCT116	H3K4me-ChIP-seq-ARID1AKO-ARID1BKD-Rep1	11979913	11979913	10594738	88.44	10408674	1265133	0.119411
HCT116	H3K4me3-ChIP-seq-WT-Rep1	17687717	17687717	15947124	90.16	14902902	6243427	0.391508
HCT116	H3K4me3-ChIP-seq-WT-Rep2	14207175	14207175	12573046	88.5	12128177	2770135	0.220323
HCT116	H3K4me3-ChIP-seq-ARID1BKD-Rep1	16841594	16841594	14986053	88.98	14385922	3896900	0.260035
HCT116	H3K4me3-ChIP-seq-ARID1BKD-Rep2	14820697	14820697	13117380	88.51	12664732	2995847	0.228388
HCT116	H3K4me3-ChIP-seq-ARID1AKO-Rep1	17893882	17893882	16073837	89.83	15032567	12133824	0.75488
HCT116	H3K4me3-ChIP-seq-ARID1AKO-Rep2	15786345	15786345	13880570	87.93	13483122	4353080	0.31361
HCT116	H3K4me3-ChIP-seq-ARID1AKO-ARID1BKD-Rep1	16784741	16784741	14946515	89.05	14308324	4200033	0.281004
HCT116	H3K4me3-ChIP-seq-ARID1AKO-ARID1BKD-Rep1	15734659	15734659	13875210	88.18	13442804	2454823	0.176922
HCT116	H3K27ac-ChIP-seq-WT-Rep1	21728707	21728707	19330373	88.96	18570963	3555394	0.183928
HCT116	H3K27ac-ChIP-seq-WT-Rep2	11165409	11165409	9859773	88.31	9676821	1163803	0.118035
HCT116	H3K27ac-ChIP-seq-ARID1BKD-Rep1	19297050	19297050	16956412	87.87	16472823	1269177	0.0748494
HCT116	H3K27ac-ChIP-seq-ARID1BKD-Rep2	11937191	11937191	10529016	88.2	10332946	1161530	0.110317
HCT116	H3K27ac-ChIP-seq-ARID1AKO-Rep1	23368233	23368233	20821392	89.1	20090426	4484225	0.215366
HCT116	H3K27ac-ChIP-seq-ARID1AKO-Rep2	13395636	13395636	11804670	88.12	11570973	1387277	0.117519
HCT116	H3K27ac-ChIP-seq-ARID1AKO-ARID1BKD-Rep1	15325790	15325790	13607737	88.79	13236010	2524030	0.185485
HCT116	H3K27ac-ChIP-seq-ARID1AKO-ARID1BKD-Rep1	14305742	14305742	12665837	88.54	12395975	1971306	0.15564
HCT116	H3K27me3-ChIP-seq-WT-Rep1	17909658	17909658	15568811	86.93	15270403	68616	0.00440727
HCT116	H3K27me3-ChIP-seq-WT-Rep2	14978370	14978370	12986492	86.7	12721000	35128	0.00270496
HCT116	H3K27me3-ChIP-seq-ARID1BKD-Rep1	13937094	13937094	12113790	86.92	11874467	39143	0.00323128
HCT116	H3K27me3-ChIP-seq-ARID1BKD-Rep2	14549892	14549892	12657471	86.99	12391797	51065	0.00403438
HCT116	H3K27me3-ChIP-seq-ARID1AKO-Rep1	16886773	16886773	14659387	86.81	14352199	62454	0.00426034
HCT116	H3K27me3-ChIP-seq-ARID1AKO-Rep2	17358174	17358174	15055006	86.73	14680371	73292	0.00486828
HCT116	H3K27me3-ChIP-seq-ARID1AKO-ARID1BKD-Rep1	17103831	17103831	14853334	86.84	14513535	90374	0.00608443
HCT116	H3K27me3-ChIP-seq-ARID1AKO-ARID1BKD-Rep1	16435248	16435248	14248094	86.69	13905191	92378	0.00648353
HCT116	Input-ChIP-seq-WT-Rep1	8094076	8094076	6715734	82.97	6592739
HCT116	Input-ChIP-seq-ARID1BKD-Rep1	13067027	13067027	10721054	82.05	10504226
HCT116	Input-ChIP-seq-ARID1AKO-Rep1	24962062	24962062	20665891	82.79	20027476
HCT116	Input-ChIP-seq-ARID1AKO-ARID1BKD-Rep1	27504882	27504882	22793292	82.87	21946905
HCT116	RNA-seq-WT-Rep1	18255657	18255657	14813219	81.14	8075587
HCT116	RNA-seq-WT-Rep2	31996937	31996937	25859423	80.82	11930351
HCT116	RNA-seq-ARID1BKD-Rep1	19233248	19233248	15542040	80.81	8488933
HCT116	RNA-seq-ARID1BKD-Rep2	24620734	24620734	19840160	80.58	9773914
HCT116	RNA-seq-ARID1AKO-Rep1	34731072	34731072	27711199	79.79	12232078
HCT116	RNA-seq-ARID1AKO-Rep2	21422034	21422034	17001184	79.36	8732700
HCT116	RNA-seq-ARID1AKO-ARID1BKD-Rep1	20525326	20525326	16701111	81.37	8467014
HCT116	RNA-seq-ARID1AKO-ARID1BKD-Rep1	18378191	18378191	15055474	81.92	7978926
TOV21G	ATAC-seq-WT-Rep1	43306149	43306149	34568599	79.82	18077423	1004276	0.0290517
TOV21G	ATAC-seq-WT-Rep2	59384912	59384912	48715545	82.03	51924833	755472	0.0155078
TOV21G	ATAC-seq-ARID1BKD-Rep1	53339193	53339193	42571525	79.81	26211072	1347619	0.0316554
TOV21G	ATAC-seq-ARID1BKD-Rep2	62868019	62868019	50862666	80.9	47851161	973577	0.0191413
TOV21G	H3K4me-ChIP-seq-WT-Rep1	20136712	20136712	18468334	91.71	17455417	6378684	0.345385
TOV21G	H3K4me-ChIP-seq-WT-Rep2	19010160	19010160	17406838	91.57	16797192	5414917	0.31108
TOV21G	H3K4me-ChIP-seq-ARID1BKD-Rep1	21607153	21607153	19744499	91.38	19195402	6183603	0.313181
TOV21G	H3K4me-ChIP-seq-ARID1BKD-Rep2	19622999	19622999	17861314	91.02	17087479	4451764	0.249241
TOV21G	H3K4me3-ChIP-seq-WT-Rep1	20460465	20460465	19278132	94.22	14927908	15823220	0.820786
TOV21G	H3K4me3-ChIP-seq-WT-Rep2	16536212	16536212	15635235	94.55	12469916	13353387	0.854057
TOV21G	H3K4me3-ChIP-seq-ARID1BKD-Rep1	18460537	18460537	17333804	93.9	13946237	13838688	0.798364
TOV21G	H3K4me3-ChIP-seq-ARID1BKD-Rep2	24860411	24860411	23455260	94.35	17181379	20083514	0.856248
TOV21G	H3K27ac-ChIP-seq-WT-Rep1	24321316	24321316	22217988	91.35	21028292	8116027	0.365291
TOV21G	H3K27ac-ChIP-seq-WT-Rep2	23680119	23680119	21591760	91.18	20073365	10313822	0.477674
TOV21G	H3K27ac-ChIP-seq-ARID1BKD-Rep1	20386388	20386388	18640644	91.44	17991706	6272379	0.336489
TOV21G	H3K27ac-ChIP-seq-ARID1BKD-Rep2	16090387	16090387	14738176	91.6	13893402	7296221	0.495056
TOV21G	Input-ChIP-seq-WT-Rep1	17392002	17392002	14636056	84.15	14303388
TOV21G	Input-ChIP-seq-ARID1BKD-Rep1	20617090	20617090	16885528	81.9	16347027
TOV21G	RNA-seq-WT-Rep1	19735872	19735872	16579455	84.01	7622408
TOV21G	RNA-seq-WT-Rep2	20210441	20210441	16648547	82.38	7538364
TOV21G	RNA-seq-ARID1BKD-Rep1	21459961	21459961	18329412	85.41	8247510
TOV21G	RNA-seq-ARID1BKD-Rep2	20757673	20757673	17216639	82.94	7876272
